# Supplementary material
Source: PubMed Central journal article supplement (PMC5514787)
Supplement: NIHMS874164-supplement-sf.pdf [file NIHMS874164-supplement-sf.pdf]

## Supplemental Figures

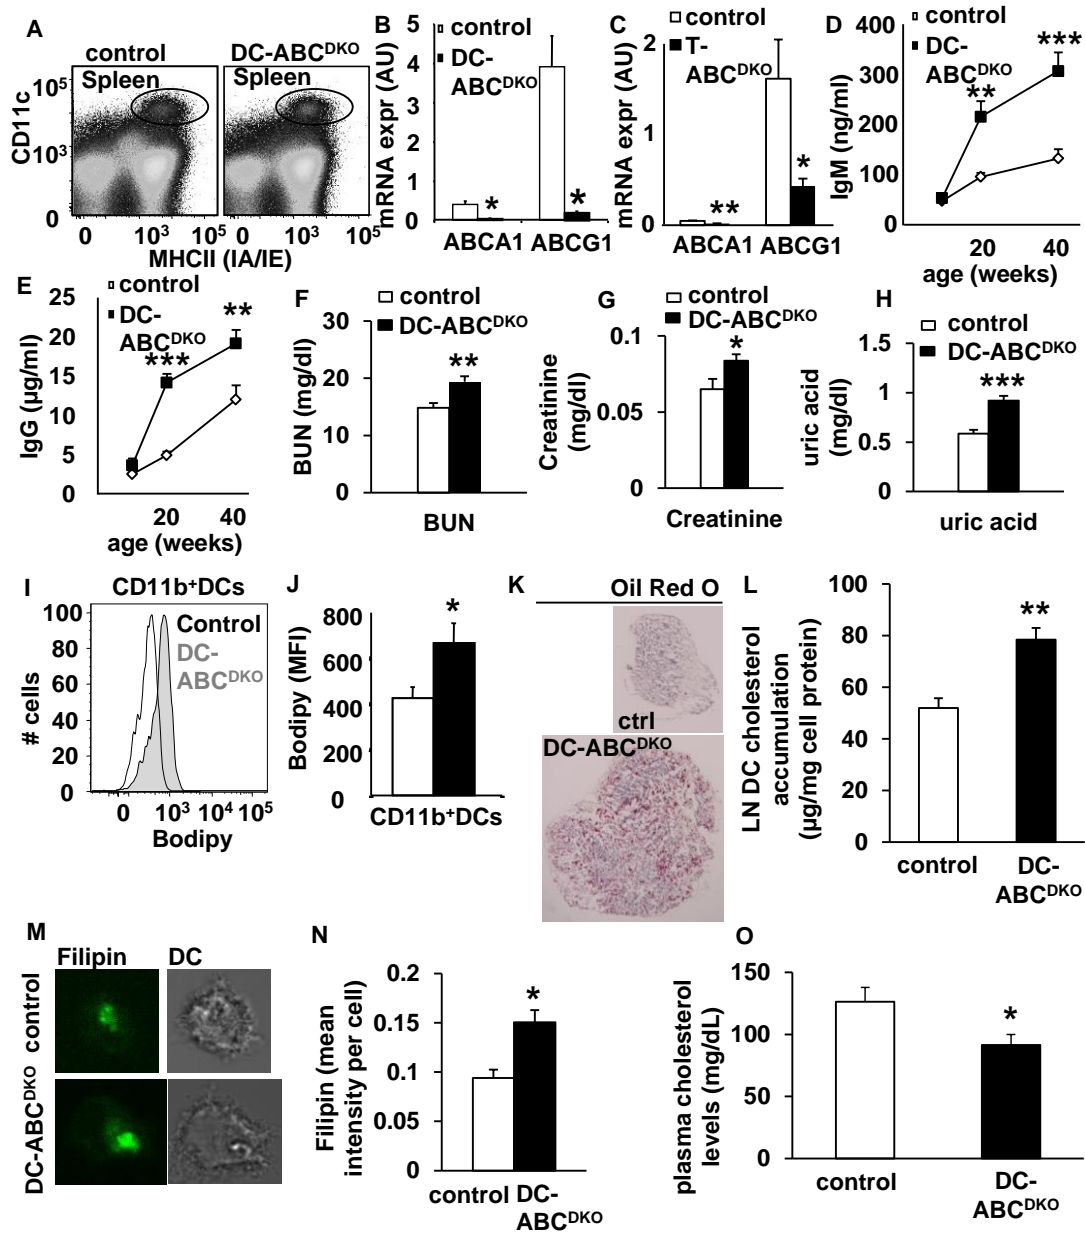

**Figure S1, related to Figure 2. DC-ABC<sup>DKO</sup> and T-ABC<sup>DKO</sup> mice show >90% and >80% decreased ABCA1 and ABCG1 mRNA expression in dendritic cells (DCs) and T-cells, respectively and DC-*Abca1/g1* deficiency induces lipid accumulation in DCs. (A) Gating strategy for isolation of splenic CD45<sup>+</sup>CD115<sup>-</sup>CD11c<sup>+</sup>MHCII<sup>+</sup> DCs in control and DC-ABC<sup>DKO</sup> mice. (B) Splenic DCs were sorted by flow cytometry and the *Abca1* and *Abcg1* mRNA expression levels were determined and corrected for the housekeeping gene m36B4. n=6. (C)**

Blood CD4<sup>+</sup> T-cells were sorted by flow cytometry and the *Abca1* and *Abcg1* mRNA expression levels were determined and corrected for the housekeeping gene m36B4. n=4. **(D-E)** Increased plasma levels of IgM **(D)** and IgG **(E)** in DC-ABC<sup>DKO</sup> mice. n=6-10. **(F-H)** Increased plasma levels of blood urea nitrogen (BUN) **(F)**, creatinine **(G)**, and uric acid **(H)** in DC-ABC<sup>DKO</sup> mice. n=10. **(I-J)** Increased lipid accumulation in splenic DC-ABC<sup>DKO</sup> CD11b<sup>+</sup> DCs assessed by BODIPY staining. n=6. **(K)** Inguinal LNs were embedded in OCT and frozen sections were made and stained for Oil Red O. Lipid accumulation in DC-ABC<sup>DKO</sup>, but not in control LNs. All sections (n=6) studied showed Oil Red O staining in DC-ABC<sup>DKO</sup> but not in control LNs. Representative pictures are shown. **(L)** DC-*Abca1/g1* deficiency enhances cholesterol accumulation in DCs. CD11c<sup>+</sup> cells were isolated from the lymph nodes of control and DC-ABC<sup>DKO</sup> mice using CD11c positive beads, lipids were extracted, and cholesterol was assessed using an enzymatic assay and corrected for cell protein. n=6. **(M-N)** Bone marrow cells were differentiated into DCs by treatment with GM-CSF and were stained with filipin. Representative pictures of n=5 fields are shown **(M)** and filipin staining was quantified **(N)**. **(O)** Plasma cholesterol levels in 20 week old control and DC-ABC<sup>DKO</sup> mice fed a chow diet. n=10. Data in **B, C-H, J, L, N, and O** are presented as mean ± SEM. \**P*<0.05, \*\**P*<0.01, \*\*\**P*<0.001, by t-test.

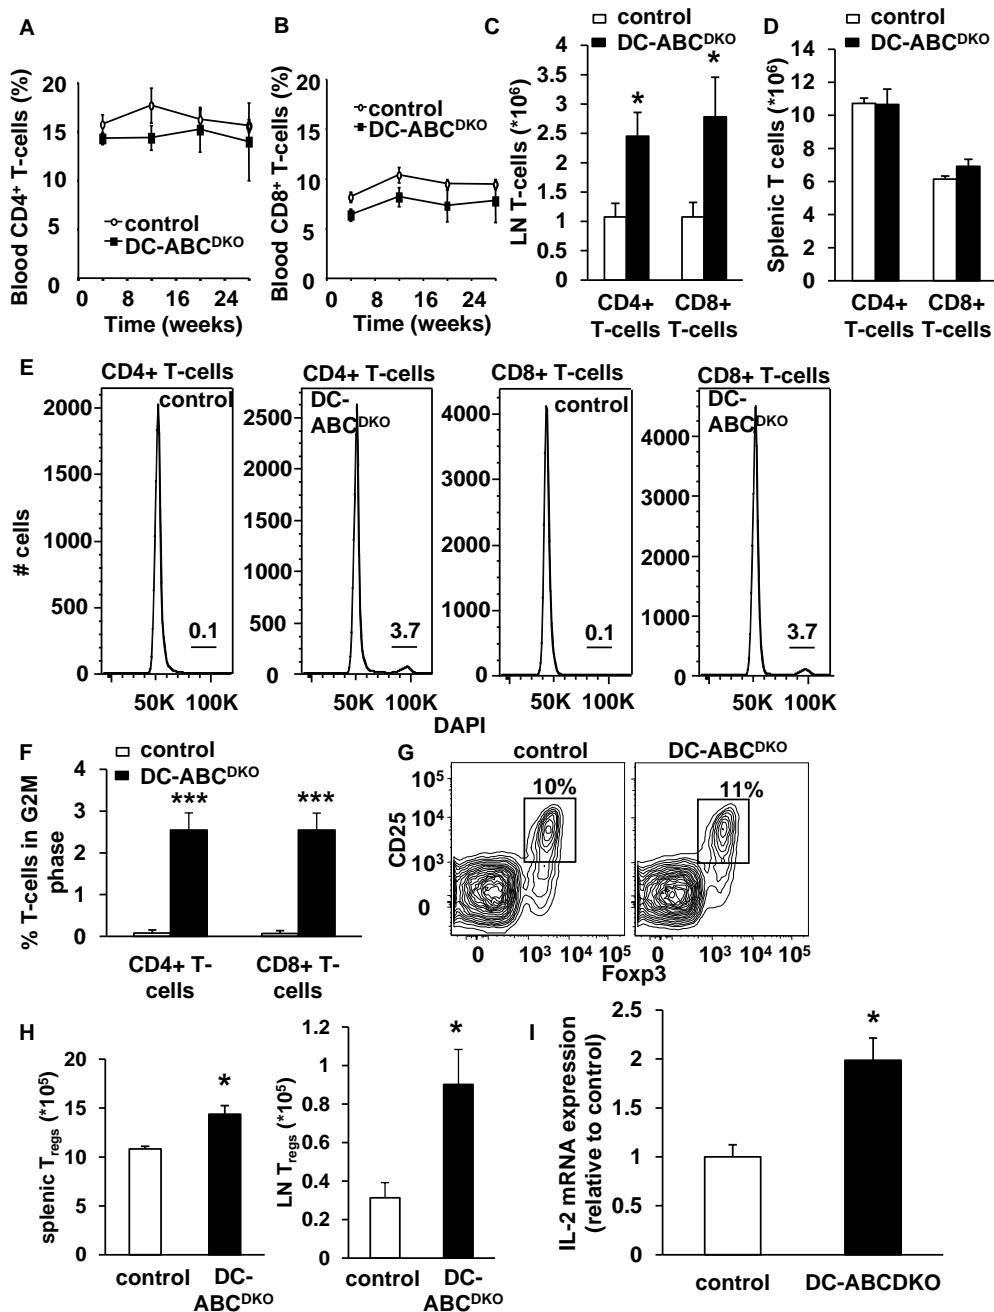

**Figure S2, related to Figure 3. Effect of DC *Abca1/g1* deficiency on CD4<sup>+</sup> and CD8<sup>+</sup> T-cell numbers, T-cell proliferation, and T<sub>regs</sub>.** CD4<sup>+</sup> and CD8<sup>+</sup> T-cell percentage was assessed in blood (A-B), and CD4<sup>+</sup> and CD8<sup>+</sup> T-cell numbers in inguinal lymph nodes (C) and spleen (D) n=5-8. All data in (A-D) were measured concurrently with T-cell activation measurements. (E and F) CD4<sup>+</sup> and CD8<sup>+</sup> T-cell proliferation was assessed using DAPI in lymph nodes and

calculated in Flow Jo using the Watson model. (E) T-cell proliferation graphs. Percentages show cells in the G2M phase. (F) Quantification of T-cells in the G2M phase. n=5. (G) and (H) DC-ABC<sup>DKO</sup> mice show increased T<sub>regs</sub> in spleen and lymph nodes. (G) Gating strategy. (H) Splenic T<sub>reg</sub> and lymph node T<sub>reg</sub> numbers. n=7. (I) DC-ABC<sup>DKO</sup> increases IL-2 mRNA in CD4<sup>+</sup> T-cells. CD4<sup>+</sup> T-cells were sorted from LNs using flow cytometry, RNA extracted, and IL-2 mRNA levels assessed. Data in A-D, F, H, and I are presented as mean ± SEM. \**P*<0.05, \*\*\**P*<0.001, by t-test.

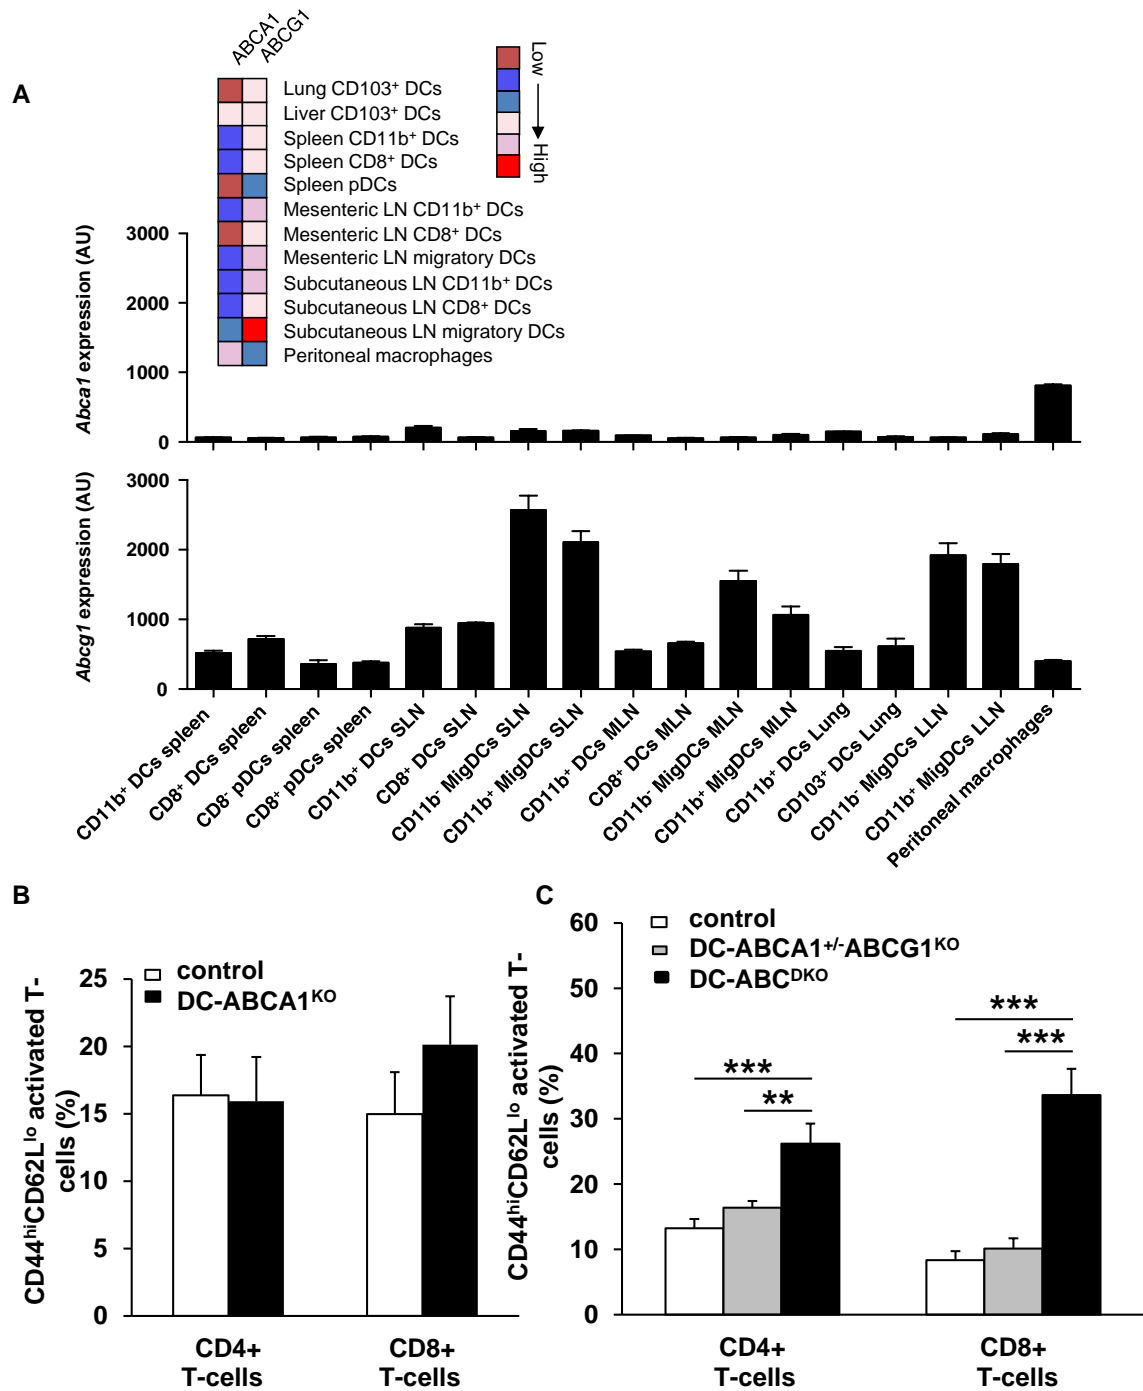

**Figure S3, related to Figure 3. ABCG1 is highly expressed in several DC subtypes but only combined deficiency of ABCA1 and ABCG1 induces T-cell activation. (A)** Expression of *Abca1* and *Abcg1* in several DC subtypes and peritoneal macrophages as assessed by microarray. Top: heatmap. Bottom: quantification of *Abca1* and *Abcg1* expression. These data were obtained

as part of the Immunological Genome Project. **(B-C)** Combined deficiency of ABCA1 and ABCG1 in DCs is required for the T-cell activation phenotype. **(B)** CD44<sup>hi</sup>CD62L<sup>lo</sup> activated CD4<sup>+</sup> and CD8<sup>+</sup> T-cells in the blood of control and DC-ABCA1<sup>KO</sup> mice. n=5. **(C)** CD44<sup>hi</sup>CD62L<sup>lo</sup> activated CD4<sup>+</sup> and CD8<sup>+</sup> T-cells in the blood of control, DC-ABCA1<sup>+/-</sup> ABCG1<sup>KO</sup> and DC-ABC<sup>DKO</sup> mice. n=5. **B** and **C**, \*\**P*<0.01, \*\*\**P*<0.001, by one-way ANOVA with Bonferroni post-test.

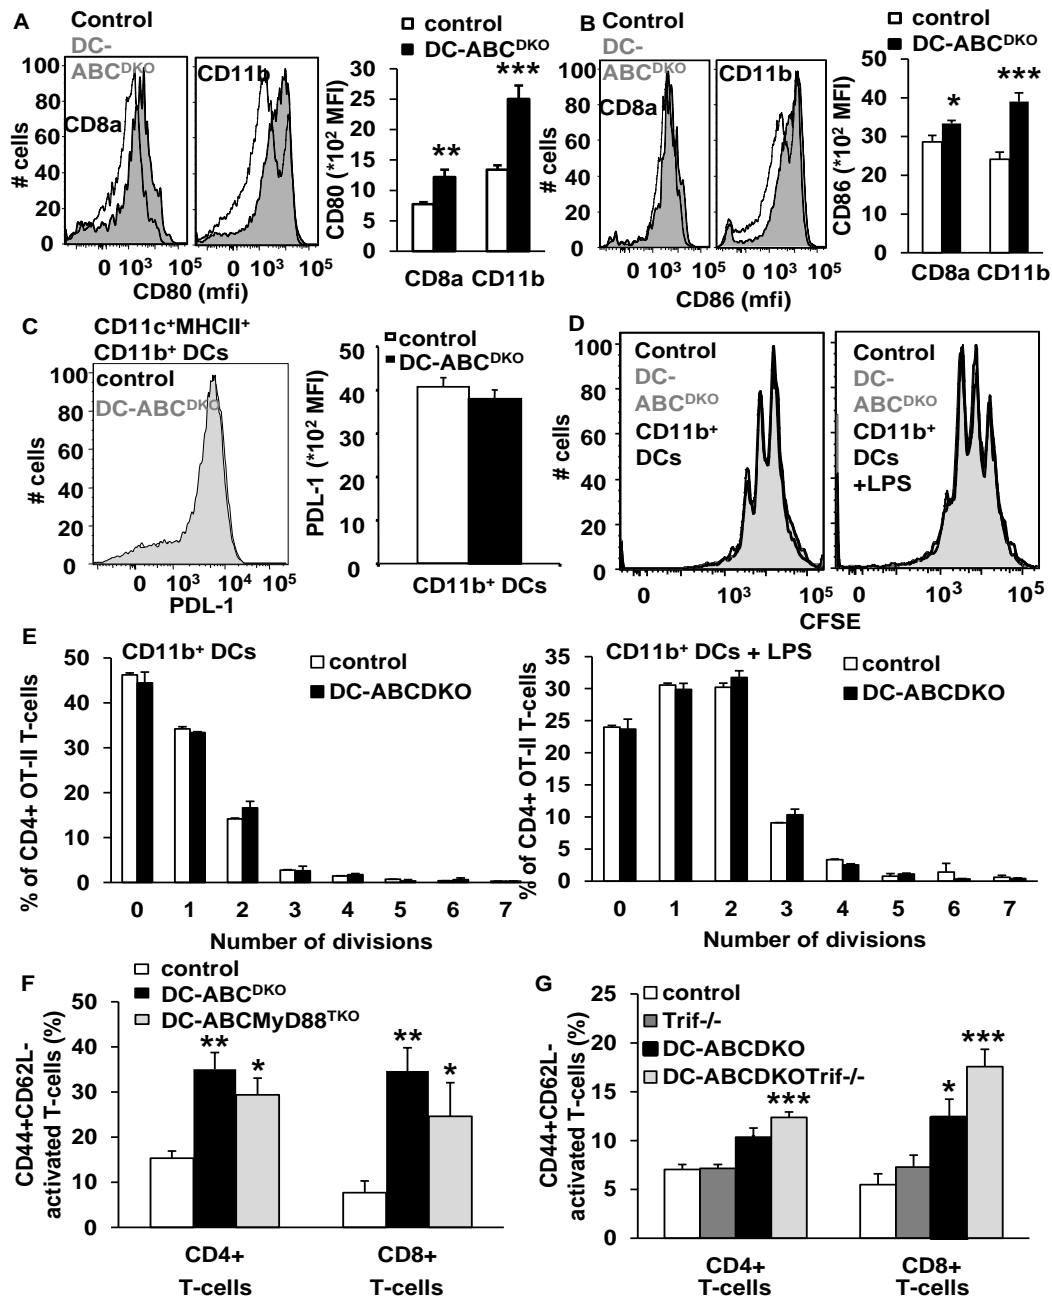

Figure S4, related to Figure 4. DC-*Abca1/g1* deficiency enhances CD80/86 expression, but does not affect PDL-1 surface expression in CD11b<sup>+</sup> DCs and antigen presentation by CD11b<sup>+</sup> DCs *in vitro*, and T-cell activation in DC-ABC<sup>DKO</sup> mice is not due to enhanced MyD88 or Trif signaling. (A-C) CD80 (A) and CD86 (B) surface levels on splenic CD11c<sup>+</sup>MHC-II<sup>+</sup>CD8a<sup>+</sup> and CD11c<sup>+</sup>MHC-II<sup>+</sup>CD11b<sup>+</sup> DCs and PDL-1 (C) surface levels on

splenic CD11c<sup>+</sup>MHC-II<sup>+</sup>CD11b<sup>+</sup> DCs determined by flow cytometry. Representative examples and quantification. n=4-6. \**P*<0.05, \*\**P*<0.01, \*\*\**P*<0.001, by t-test. **(D-E)** Bone marrow cells were stimulated with GM-CSF for 8 days to generate CD11b<sup>+</sup> DCs, incubated with or without LPS for 24 h, and then incubated with OT-II peptide in the presence of CFSE labeled CD4<sup>+</sup>OTII T-cells (ratio DC:T-cells 1:5). CFSE dilution in CD4<sup>+</sup> T-cells was assessed at 72 h after co-incubation. Representative CFSE dilutions are shown **(D)** and quantified using Flow Jo software **(E)**. n=4. Mice were fed chow diet for 16-20 weeks **(F and G)** and activated CD44<sup>+</sup>CD62L<sup>-</sup> CD4<sup>+</sup> and CD44<sup>+</sup>CD62L<sup>-</sup> CD8<sup>+</sup> T-cells in blood were measured using flow cytometry. n=6. The experiment was done twice at different timepoints. Data are presented as mean ± SEM. \**P*<0.05, \*\**P*<0.01, \*\*\**P*<0.001, compared to control, by one way ANOVA and Bonferroni post-test.



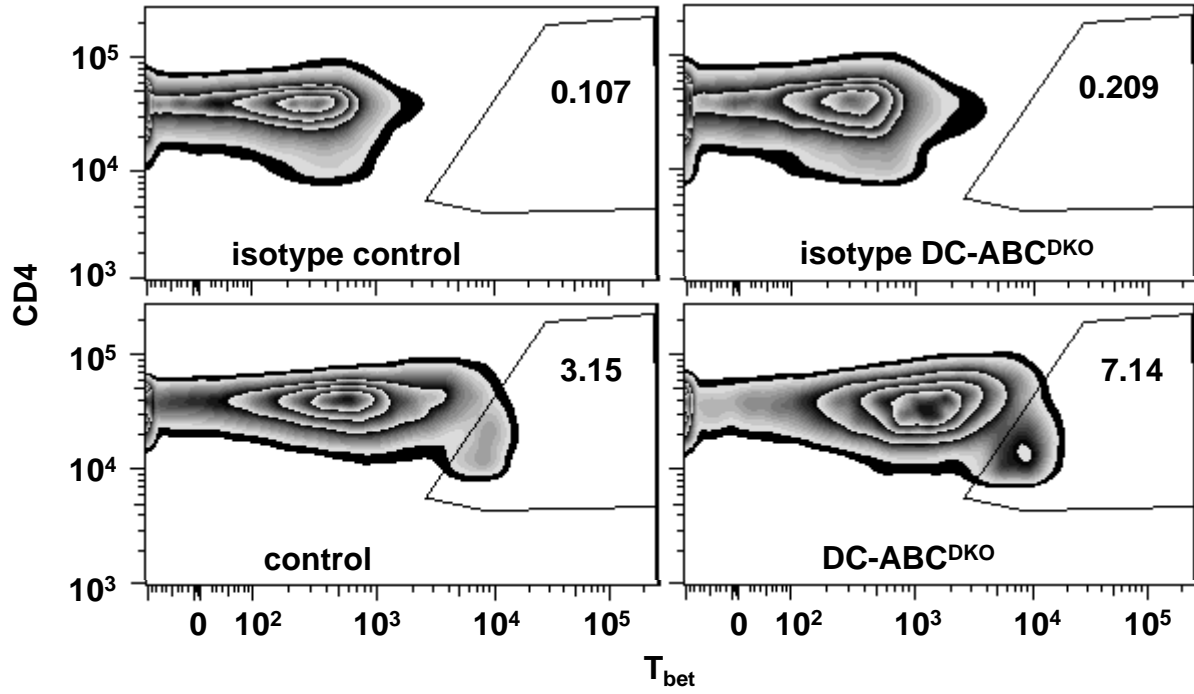

**Figure S5, related to Figure 5.** Splenic cell homogenates were stained with an antibody to CD4, fixed and permeabilized, and stained for T<sub>bet</sub> or its isotype control. Representative FACS plots are shown.

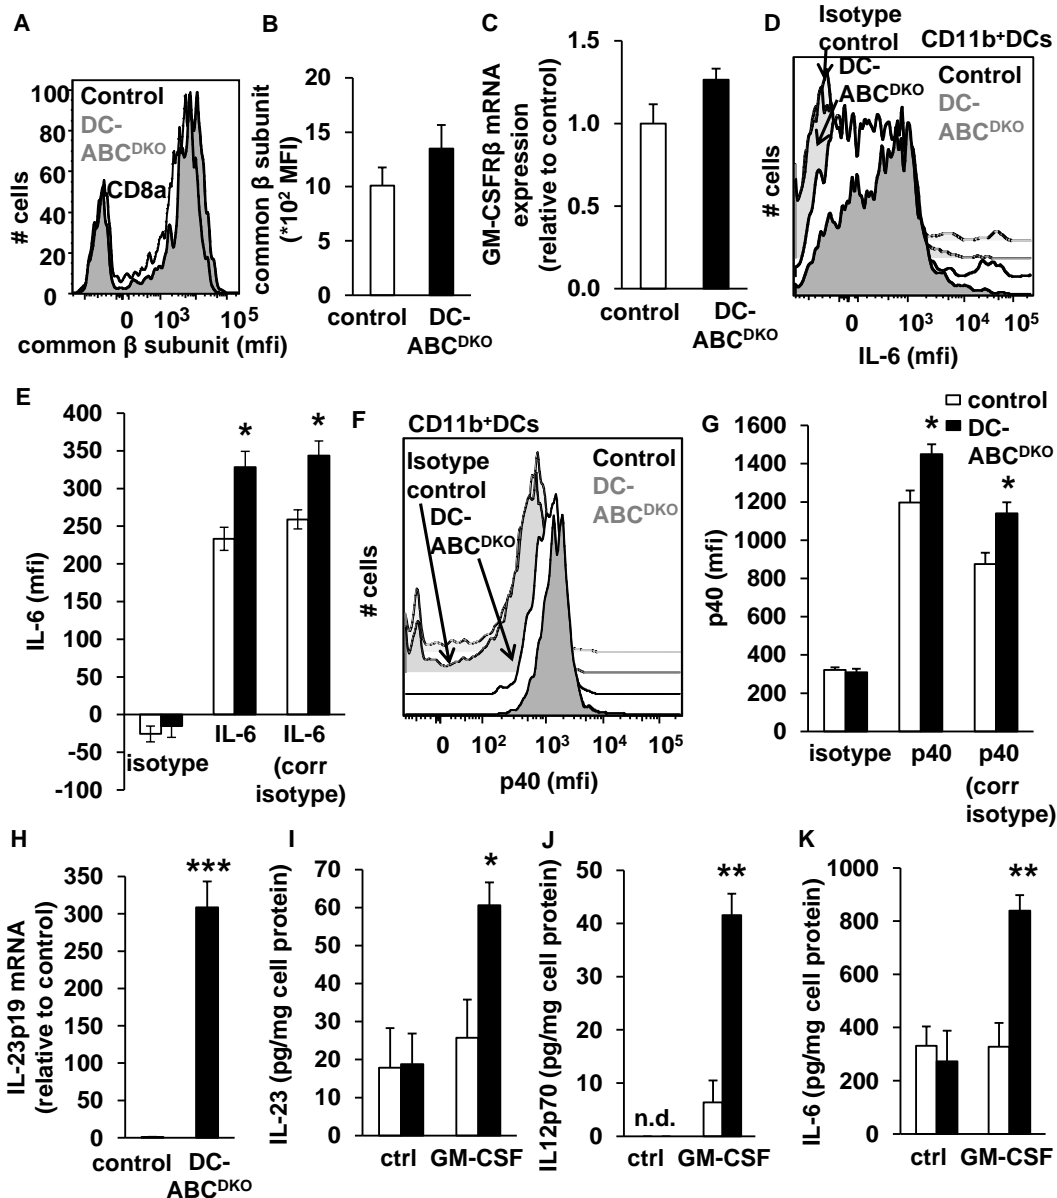

**Figure S6 related to Figure 7. DC *Abca1/g1* deficiency does not affect GM-CSFR $\beta$  surface on CD8a<sup>+</sup> DCs or GM-CSFR $\beta$  mRNA expression in CD11b<sup>+</sup> DCs, but enhances intracellular cytokines in CD11b<sup>+</sup> DCs, and secretion of interleukins induced by GM-CSF in CD11c<sup>+</sup> DCs.** Spleens were isolated from 20 week old mice. Spleens were isolated (A-B), stained for DC markers in combination with the indicated antibodies, and analyzed by flow cytometry. (A-B) DC-*Abca1/g1* deficiency did not affect the surface level of the common  $\beta$  subunit of the GM-CSF receptor on splenic CD8a<sup>+</sup> DCs. n=6. (C) CD11c<sup>+</sup>MHCII<sup>+</sup>CD11b<sup>+</sup> DCs were sorted using flow cytometry, RNA was extracted and GM-CSFR $\beta$  mRNA levels assessed. n=4. (D-G) Intracellular staining of IL-6 (D, E), and p40 (F, G) in CD11c<sup>+</sup>MHCII<sup>+</sup>CD11b<sup>+</sup> DCs.

FACS plots (**D**, **F**) and quantifications (**E**, **G**) are shown. n=4. (**H**) IL23p19 mRNA levels in CD11c<sup>+</sup>MHCII<sup>+</sup>CD11b<sup>+</sup> DCs as sorted in (**C**). n=4. (**I-K**) CD11c<sup>+</sup> cells were sorted from the spleen of 20 week old control and DC-ABC<sup>DKO</sup> mice using CD11c positive beads and then incubated with or without GM-CSF (20 ng/ml) for 24 h. IL-23 (**I**), IL-12p70 (**J**), and IL-6 (**K**) secretion were assessed and corrected for cell protein. n=4. Data in **B**, **C**, **E**, **G-K** are presented as mean ± SEM. \**P*<0.05, \*\**P*<0.01, \*\*\**P*<0.001, by t-test.

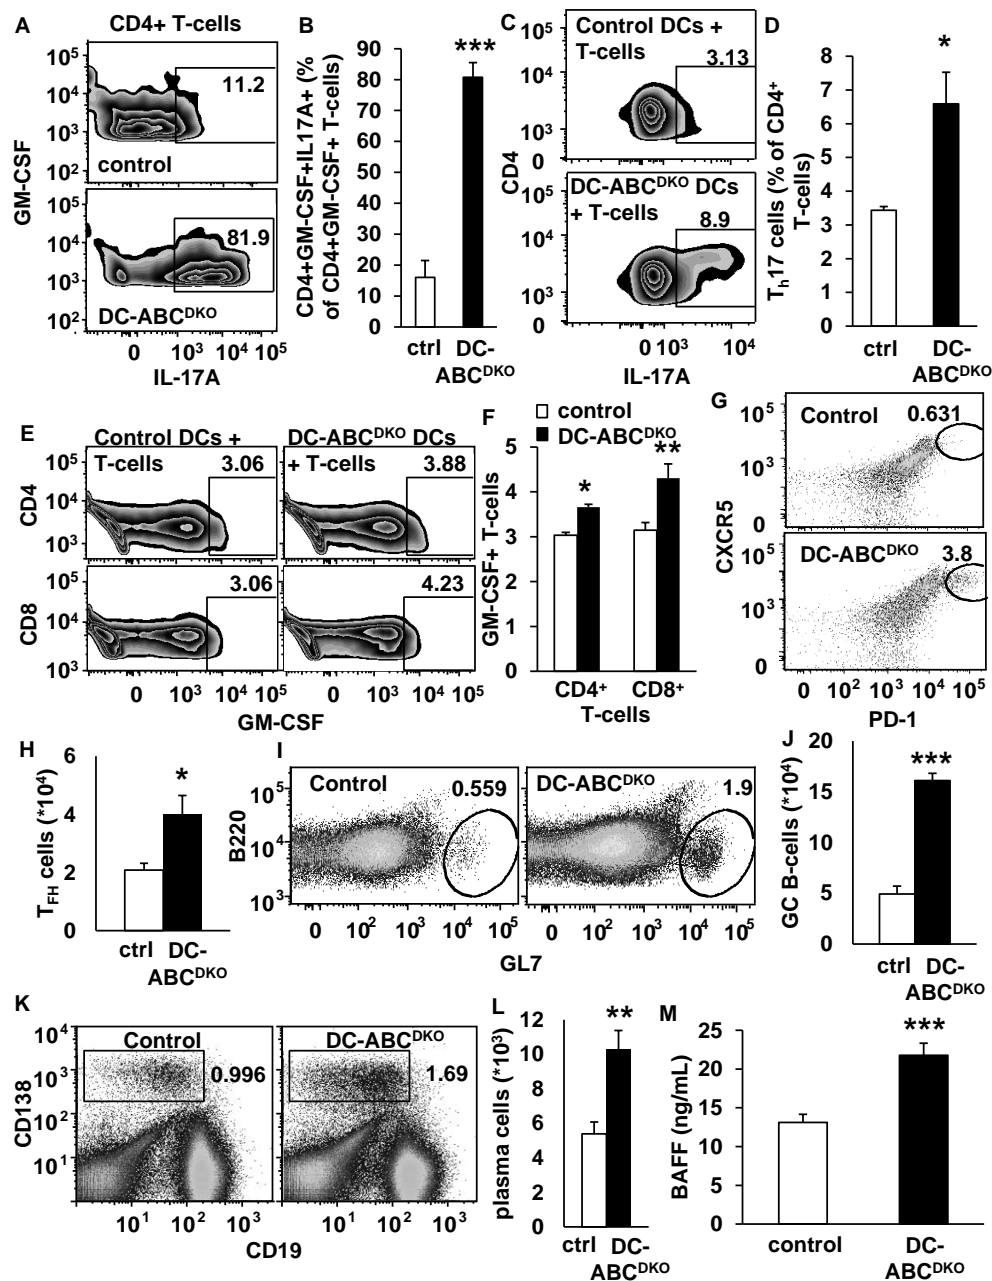

**Figure S7, related to Figure 7. DC-*Abca1/g1* deficiency leads to expansion of several T-cell subsets.** Splensens were isolated from 20 week old mice. (A-B) In DC-ABC<sup>DKO</sup> mice, GM-CSF<sup>+</sup> T-cells are highly positive for IL17A. Splenic cell homogenates were stained with antibodies to CD4, fixed and permeabilized, stained for GM-CSF and IL17A, and IL17A expression was

assessed in GM-CSF<sup>+</sup> T-cells. FACS plots (**A**), and quantification (**B**). n=4. (**C-F**) *Abca1/g1* deficiency in DCs stimulates differentiation of T-cells towards T<sub>h</sub>17 cells (**C-D**) and GM-CSF<sup>+</sup> T-cells (**E-F**) in co-incubation experiments of DCs with naïve T-cells. CD11b<sup>+</sup> DCs were isolated from splenic homogenates of control and DC-ABC<sup>DKO</sup> mice using CD11b<sup>+</sup> beads and co-incubated with splenic T-cells of 8 week old wild-type mice. Cells were co-cultured in a DC:T-cell ratio of 1:5 for 5 days and subsequently stained with antibodies to CD4, fixed and permeabilized, stained for IL17A, and T<sub>h</sub>17-cells were assessed (**C-D**). n=4. Alternatively, after co-incubation, cells were stained with antibodies to CD4 and CD8, fixed and permeabilized, stained for GM-CSF and GM-CSF<sup>+</sup> T-cells were assessed (**E-F**). n=4. (**G-L**) Splenic T- and B-cell subsets were analyzed by flow cytometry. T follicular helper (T<sub>FH</sub>) cells were identified as TCRβ<sup>+</sup>CD4<sup>+</sup>CXCR5<sup>+</sup>PD1<sup>+</sup> (**G-H**). Germinal center B-cells were identified as B220<sup>+</sup>GL7<sup>+</sup> (**I-J**). Plasma cells were identified as CD19<sup>-</sup>CD138<sup>+</sup> (**K-L**). n=6. (**M**) DC-*Abca1/g1* deficiency increased plasma BAFF levels. n=10. Data in **B**, **D**, **F**, **H**, **J**, **L**, and **M** are presented as mean ± SEM. \**P*<0.05, \*\**P*<0.01, \*\*\**P*<0.001, by t-test.
